# Supplementary material for: Polytype wurtzite-nH ZnS (n = 2 and 8): facile synthesis and photocatalytic hydrogen production under sacrificial reagents
Source: Royal Society of Chemistry journal article supplement (doi:10.1039/d1nj02432a), 2021-01-01
Supplement: d1nj02432a1.pdf [file d1nj02432a1.pdf]

## Supporting information

### **Polytyped wurtzite-nH ZnS (n=2, 8): Facile synthesis and photocatalytic hydrogen production under sacrificial reagents**

Huajuan Ren, Kun Ye, Haoyu Chen, Xuemei Zhou, Feiyu Wang, Qiaofang Shi\*,  
Guowang Diao, Ming Chen\*

School of Chemistry and Chemical Engineering, Yangzhou University, Yangzhou  
225002, P. R. China

---

\* Corresponding Authors

E-mail address: chenming@yzu.edu.cn (M. Chen); qfshi@yzu.edu.cn (Q. Shi)

## **Experimental materials**

Anhydrous zinc acetate was purchased from Saen Chemical Technology (Shanghai) Co., Ltd. Thiourea and anhydrous sodium sulfite were purchased from Sinopharm Chemical Reagent Co., Ltd. Hydrazine hydrate and ethylenediamine was obtained from Xuchen Chemical Technology Co., Ltd. Sodium sulfide nonahydrate and Cetyl Trimethyl Ammonium Bromide (CTAB) were both purchased from Aladdin. Nafion (5 wt %) was purchased from Sigma-Aldrich Chemical Reagent Co., Ltd. (USA). Deionized water was used throughout the experiments.

## **Synthesis of ZnS(en)<sub>0.5</sub>**

In a typical synthesis, 1 mmol of Zn (Ac)<sub>2</sub> and 2 mmol of thiourea were added into an autoclave with an inner Teflon lining which had been filled with 60 mL ethylenediamine of its capacity (100 mL) and heated at 180 °C for 18 h. After that, the white precipitate was collected by centrifugation, and then dried in an oven. Here, ZnS(en)<sub>0.5</sub> precursor was synthesized successfully.

**Table S1.** Comparison of photocatalytic H<sub>2</sub> production performance of previously reported ZnS-based photocatalysts with the as-prepared ZnS photocatalysts.

| Photocatalyst                                                 | Synthesis method              | Light source                           | Sacrificial reagent                                                 | Activity ( $\mu\text{mol h}^{-1}$ ) | Published year | Ref.      |
|---------------------------------------------------------------|-------------------------------|----------------------------------------|---------------------------------------------------------------------|-------------------------------------|----------------|-----------|
| ZnS hollow nanospheres                                        | Hydrothermal                  | 300 W Xe lamp (AM 1.5 G)               | 0.35 M Na <sub>2</sub> S and 0.25 M Na <sub>2</sub> SO <sub>3</sub> | 80.1                                |                | This work |
| ZnS nanosheets                                                | Solvothermal                  | 300 W Xe lamp (AM 1.5 G)               | 0.35 M Na <sub>2</sub> S and 0.25 M Na <sub>2</sub> SO <sub>3</sub> | 9.24                                |                | This work |
| Graphene Oxide-Zn <sub>x</sub> Cd <sub>1-x</sub> S            | Coprecipitation-hydrothermal  | Simulated sunlight (AM 1.5 G)          | 0.35 M Na <sub>2</sub> S and 0.25 M Na <sub>2</sub> SO <sub>3</sub> | 1.82                                | 2012           | 1         |
| 5.0 % Pd /ZnS                                                 | Co-precipitation              | 300 W Xe lamp ( $\lambda \geq 420$ nm) | 0.35 M Na <sub>2</sub> S and 0.25 M Na <sub>2</sub> SO <sub>3</sub> | 10.22                               | 2018           | 2         |
| 2.0 % Au ZnO@ZnS                                              | Chemical deposition           | 300 W Xe lamp ( $\lambda \geq 400$ nm) | 0.35 M Na <sub>2</sub> S and 0.25 M Na <sub>2</sub> SO <sub>3</sub> | 30.43                               | 2019           | 3         |
| Pt/Mn-ZnS                                                     | Solvothermal                  | 300 W Xe lamp ( $\lambda \geq 400$ nm) | 0.35 M Na <sub>2</sub> S and 0.25 M Na <sub>2</sub> SO <sub>3</sub> | 0.42                                | 2017           | 4         |
| Zn <sub>1-x</sub> Cd <sub>x</sub> S/D-ZnS (en) <sub>0.5</sub> | Solvothermal                  | 300 W Xe lamp ( $\lambda \geq 400$ nm) | 0.35 M Na <sub>2</sub> S and 0.25 M Na <sub>2</sub> SO <sub>3</sub> | 463.6                               | 2018           | 5         |
| ZnS                                                           | ionic solutions               | 150 W Xe lamp (AM 1.5 G)               | 60 mM Na <sub>2</sub> S                                             | 1.35                                | 2014           | 6         |
| CuS/ZnS                                                       | Hydrothermal                  | 350 W Xe lamp ( $\lambda \leq 420$ nm) | 0.35 M Na <sub>2</sub> S and 0.25 M Na <sub>2</sub> SO <sub>3</sub> | 257.6                               | 2015           | 7         |
| Ni-P/defect-rich ZnS                                          | Hydrothermal /Photodeposition | 300 W Xe lamp ( $\lambda \geq 400$ nm) | 0.35 M Na <sub>2</sub> S and 0.25 M Na <sub>2</sub> SO <sub>3</sub> | 69.92                               | 2020           | 8         |

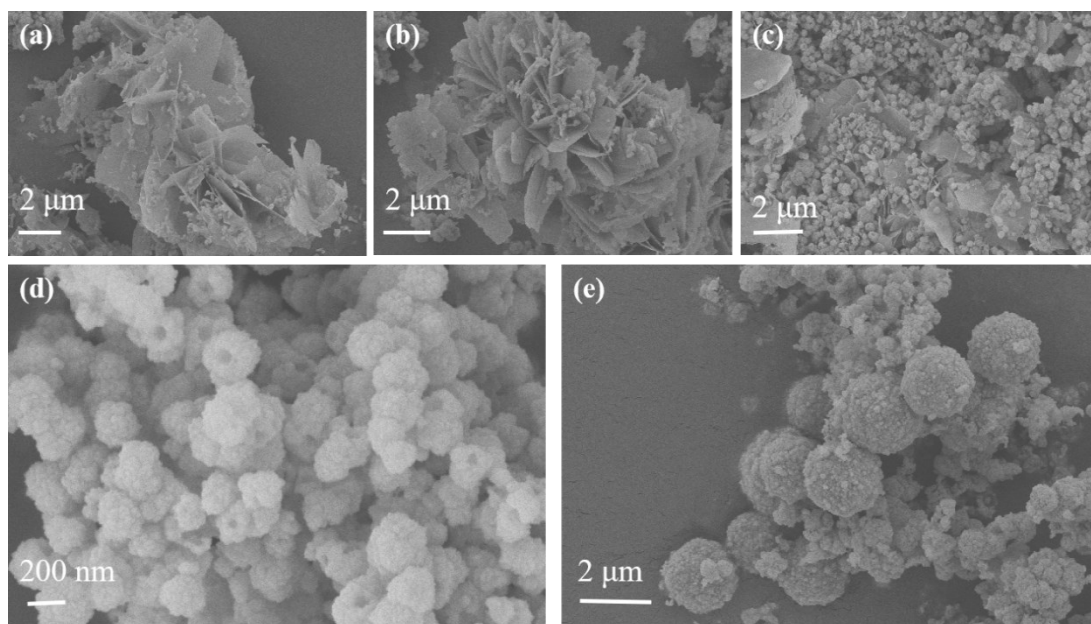

**Fig. S1.** SEM images of ZnS (a) the molar ratio of Zn to S is 1:1, (b) 1: 2, (c) 1:2.5, (d) 1:3 (ZnS hollow spheres), (e) 1:4.

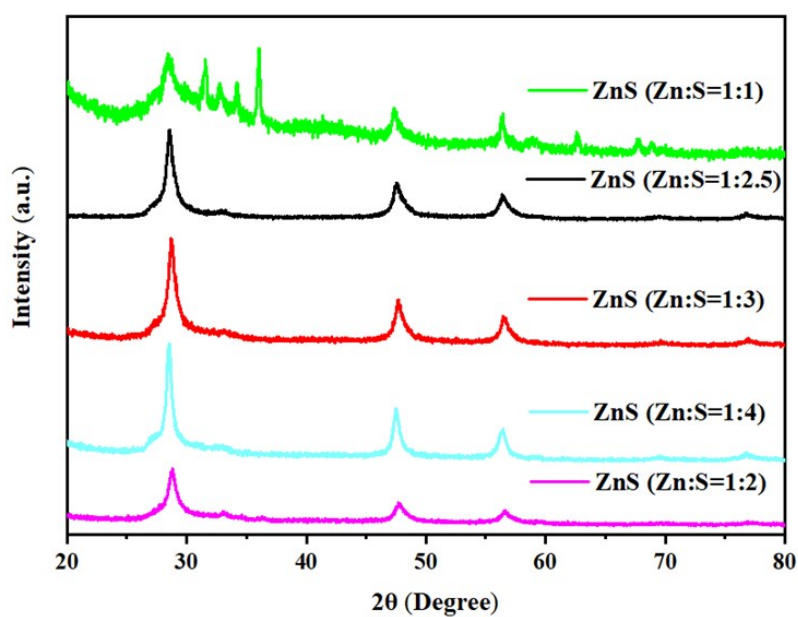

**Fig. S2.** XRD patterns of ZnS (a) the molar ratio of Zn to S is 1:1, (b) 1: 2, (c) 1:2.5, (d) 1:3 (ZnS hollow spheres), (e)1:4.

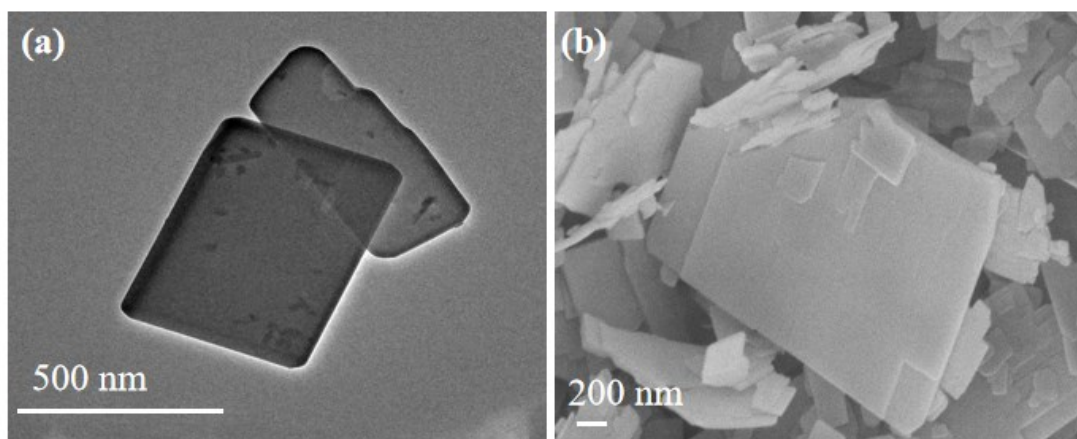

**Fig. S3.** (a) TEM and (b) SEM images of  $\text{ZnS}(\text{en})_{0.5}$ .

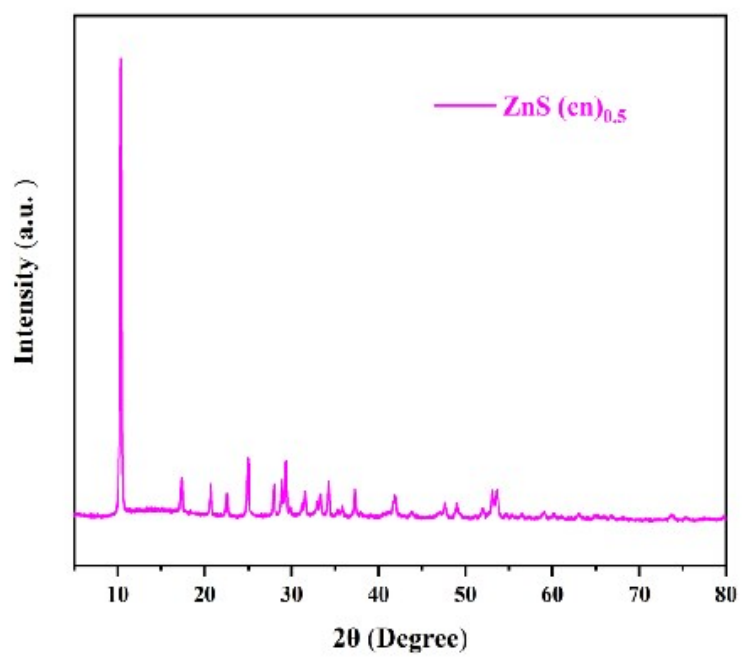

**Fig. S4.** XRD pattern of  $\text{ZnS}(\text{en})_{0.5}$ .

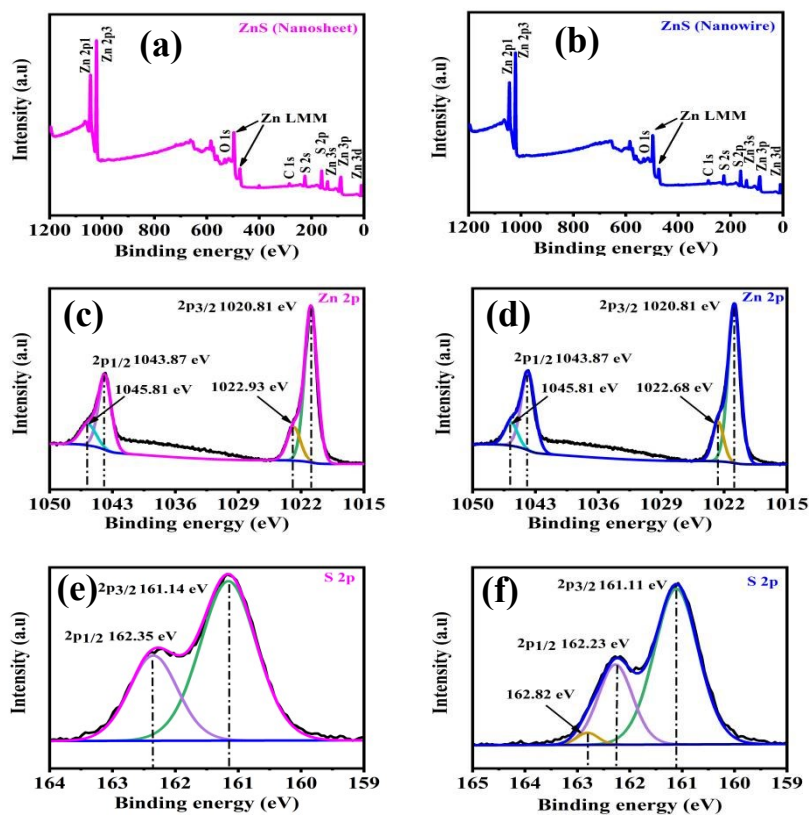

**Fig. S5.** High-resolution XPS spectra of ZnS nanosheets: (a) fully scanned spectra, (c) Zn 2p, (e) S 2p. High-resolution XPS spectra of ZnS nanowires: (b) fully scanned spectra, (d) Zn 2p, (f) S 2p.

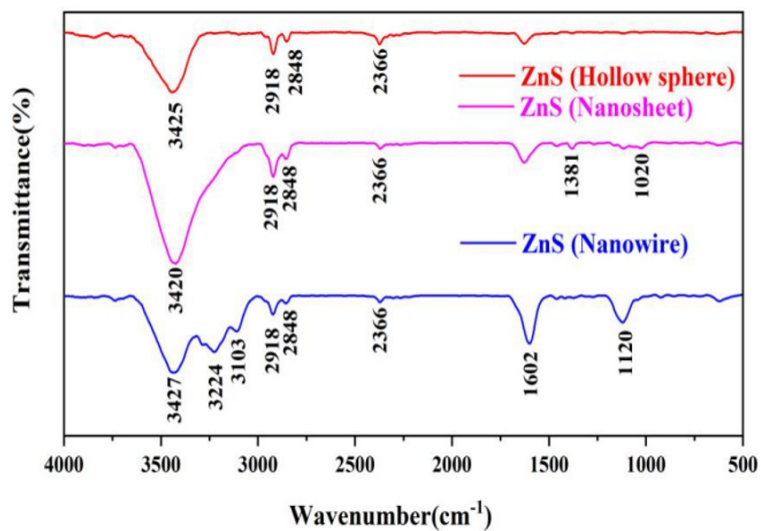

Fig. S6. FT-IR spectroscopy of the three samples.

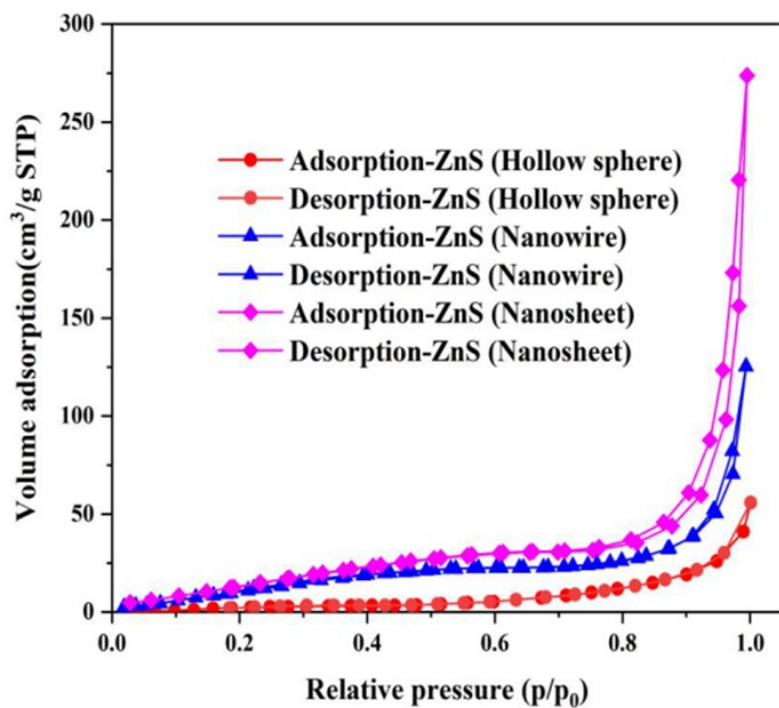

Fig. S7. Nitrogen adsorption/desorption isotherms of the three samples.

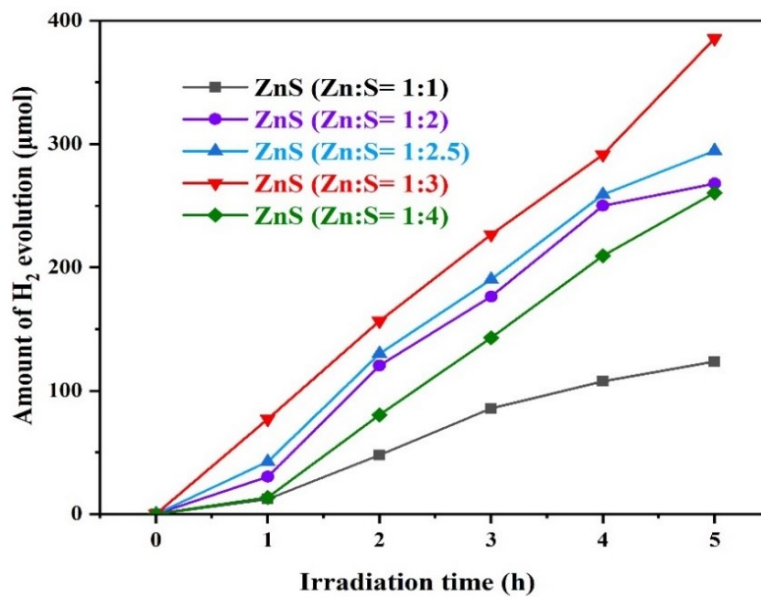

**Fig. S8.** The photocatalytic hydrogen evolution of ZnS (a) the Molar ratio of Zn to S is 1:1, (b) 1: 2, (c) 1:2.5, (d) 1:3 (ZnS hollow spheres), (e) 1:4.



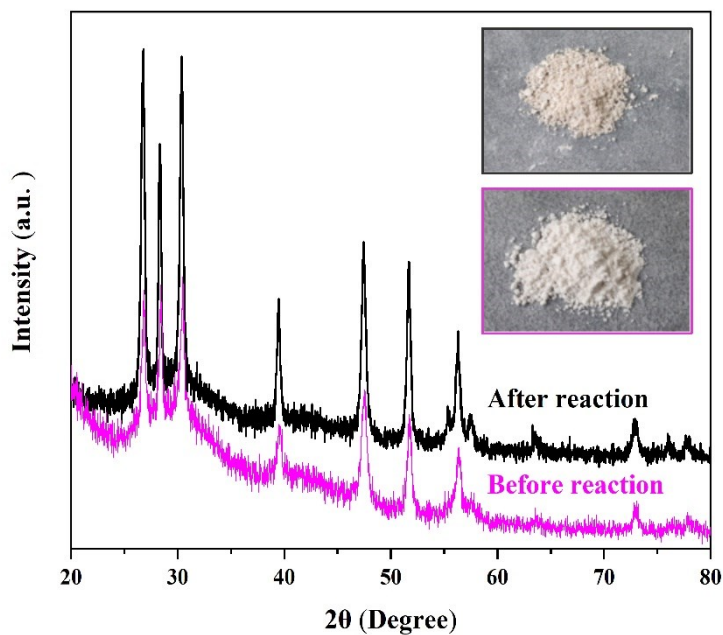

**Fig. S9.** Comparison of XRD pattern before and after photocatalytic hydrogen production experiment of ZnS nanosheets.

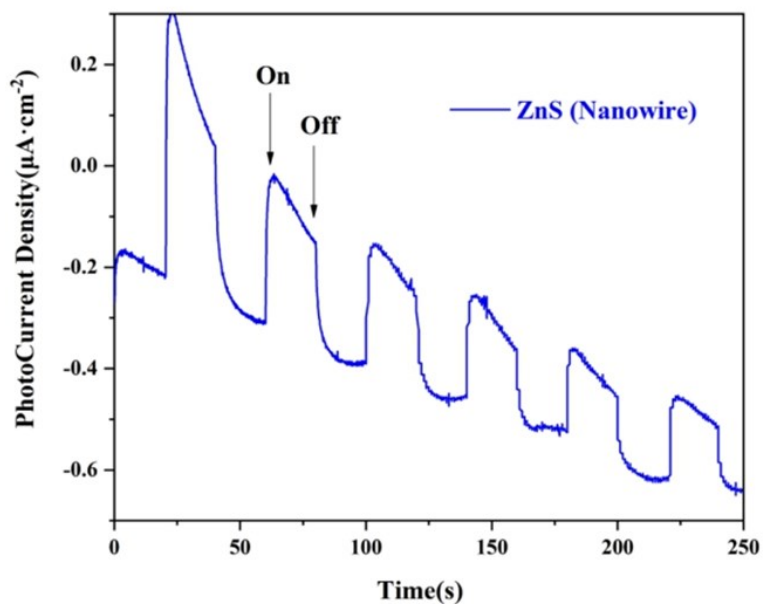

**Fig. S10.** Transient photocurrent response for the ZnS nanowires in 0.5 M  $\text{Na}_2\text{SO}_4$  aqueous solution under 300 W light irradiation (AM 1.5 G).

## References

1. Zhang, J.; Yu, J.; Jaroniec, M.; Gong, J. R., Noble metal-free reduced graphene oxide-Zn<sub>x</sub>Cd<sub>1-x</sub>S nanocomposite with enhanced solar photocatalytic H<sub>2</sub>-production performance. *Nano Lett.* **2012**, 12 (9), 4584-4589.
2. Gaikwad, A. P.; Betty, C. A.; Jagannath; Kumar, A.; Sasikala, R., Microflowers of Pd doped ZnS for visible light photocatalytic and photoelectrochemical applications. *Mater. Sci. Semicond. Process.* **2018**, 86, 139-145.
3. Ma, D.; Shi, J.-W.; Sun, D.; Zou, Y.; Cheng, L.; He, C.; Wang, H.; Niu, C.; Wang, L., Au decorated hollow ZnO@ZnS heterostructure for enhanced photocatalytic hydrogen evolution: The insight into the roles of hollow channel and Au nanoparticles. *Appl. Catal., B* **2019**, 244, 748-757.
4. Wang, L.; Wang, P.; Huang, B.; Ma, X.; Wang, G.; Dai, Y.; Zhang, X.; Qin, X., Synthesis of Mn-doped ZnS microspheres with enhanced visible light photocatalytic activity. *Appl. Surf. Sci.* **2017**, 391, 557-564.
5. Feng, W.; Wang, Y.; Huang, X.; Wang, K.; Gao, F.; Zhao, Y.; Wang, B.; Zhang, L.; Liu, P., One-pot construction of 1D/2D Zn<sub>1-x</sub>Cd<sub>x</sub>S/D-ZnS(en)<sub>0.5</sub> composites with perfect heterojunctions and their superior visible-light-driven photocatalytic H<sub>2</sub> evolution. *Appl. Catal., B* **2018**, 220, 324-336.
6. Hong, E.; Kim, D.; Kim, J. H., Heterostructured metal sulfide (ZnS–CuS–CdS) photocatalyst for high electron utilization in hydrogen production from solar water splitting. *J. Ind. Eng. Chem.* **2014**, 20 (5), 3869-3874.
7. Hong, Y.; Zhang, J.; Huang, F.; Zhang, J.; Wang, X.; Wu, Z.; Lin, Z.; Yu, J., Enhanced visible light photocatalytic hydrogen production activity of CuS/ZnS nanoflower spheres. *J. Mater. Chem. A* **2015**, 3 (26), 13913-13919.
8. Zhu, S.; Qian, X.; Lan, D.; Yu, Z.; Wang, X.; Su, W., Accelerating charge transfer for highly efficient visible-light-driven photocatalytic H<sub>2</sub> production: In-situ constructing Schottky junction via anchoring Ni-P alloy onto defect-rich ZnS. *Appl. Catal., B* **2020**, 269, 118806.
